# Supplementary material
Source: ML conference proceedings conference paper supplement (https://openaccess.thecvf.com/content/ACCV2022/html/Iida_Visual_Explanation_Generation_ACCV_2022_paper.html)
Supplement: Supplementary file 1 [file Iida_Visual_Explanation_Generation_ACCV_2022_supplemental.pdf]

# Supplementary Materials: Visual Explanation Generation Based on Lambda Attention Branch Networks

Tsumugi Iida<sup>1</sup>, Takumi Komatsu<sup>1</sup>, Kanta Kaneda<sup>1</sup>, Tsubasa Hirakawa<sup>2</sup>,  
Takayoshi Yamashita<sup>2</sup>, Hironobu Fujiyoshi<sup>2</sup>, and Komei Sugiura<sup>1</sup>

<sup>1</sup> Keio University, {tiida,tak3k\_1999,k.kaneda,komei.sugiura}@keio.jp

<sup>2</sup> Chubu University, {hirakawa,takayoshi,fujiyoshi}@isc.chubu.ac.jp

## A Experimental Visualization Diagrams

Fig.1 shows the experimental visualization diagrams. Fig.1 summarizes the overview of the LABN and the quantitative results in the IDRiD and DeFN magnetograms dataset.

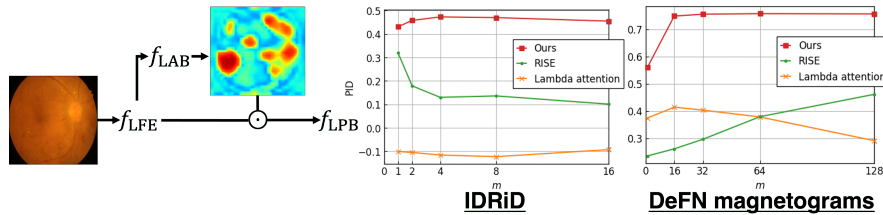

Fig. 1. experimental visualization diagram.

## B Additional Results

We computed the Insertion and Deletion scores[24] in the process of calculating ID and PID. Table 1 shows the quantitative results of Insertion and Deletion scores. We have added this table to the paper. For the IDRiD, the table shows that the Insertion score was 0.755, 0.529, and 0.827 points for RISE, Lambda attention and LABN, respectively. The Insertion score of LABN was better than that of RISE by 0.072 points. Similarly, the Deletion score improved by 0.051 points, respectively, when LABN was used. For the DeFN magnetograms dataset, the table shows that the Insertion and Deletion scores were also improved.

**Table 1.** Quantitative results of the Insertion and Deletion scores on the IDRiD (upper table) and DeFN magnetograms dataset (lower table).

| Method                | RISE [4]          | Lambda attention [31] | Ours (LABN)                         |
|-----------------------|-------------------|-----------------------|-------------------------------------|
| Insertion $\uparrow$  | 0.765 $\pm$ 0.019 | 0.529 $\pm$ 0.088     | <b>0.827 <math>\pm</math> 0.034</b> |
| Deletion $\downarrow$ | 0.447 $\pm$ 0.029 | 0.630 $\pm$ 0.070     | <b>0.396 <math>\pm</math> 0.192</b> |

  

| Method                | RISE [4]          | Lambda attention [31] | Ours (LABN)                         |
|-----------------------|-------------------|-----------------------|-------------------------------------|
| Insertion $\uparrow$  | 0.562 $\pm$ 0.088 | 0.600 $\pm$ 0.118     | <b>0.742 <math>\pm</math> 0.102</b> |
| Deletion $\downarrow$ | 0.327 $\pm$ 0.119 | 0.226 $\pm$ 0.133     | <b>0.099 <math>\pm</math> 0.120</b> |
